# Supplementary material
Source: publisher site journal article supplement (https://www.dovepress.com/article/303330)
Supplement: Supplementary file 1 [file get_supplementary_file.php]

**Supplementary Materials**

**
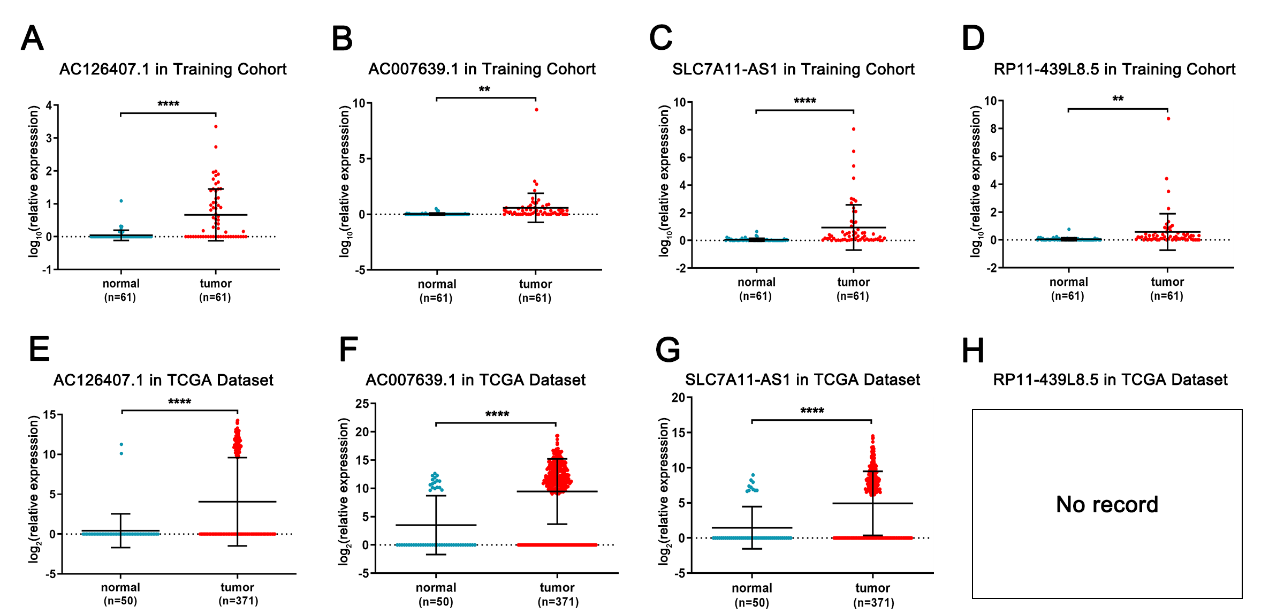
**

**Supplementary Figure S1. The expressions of 4 lncRNAs in our constructed RNA-seq dataset and TCGA dataset.** A to D, The expressions of AC126407.1 (A), AC007639.1 (B), SLC7A11-AS1 (C) and RP11-439L8.3 (D) in our constructed RNA-seq dataset. E to H, The expressions of AC126407.1 (E), AC007639.1 (F), SLC7A11-AS1 (G) and RP11-439L8.3 (H) in TCGA dataset. ** p < 0.01 and **** p < 0.0001.


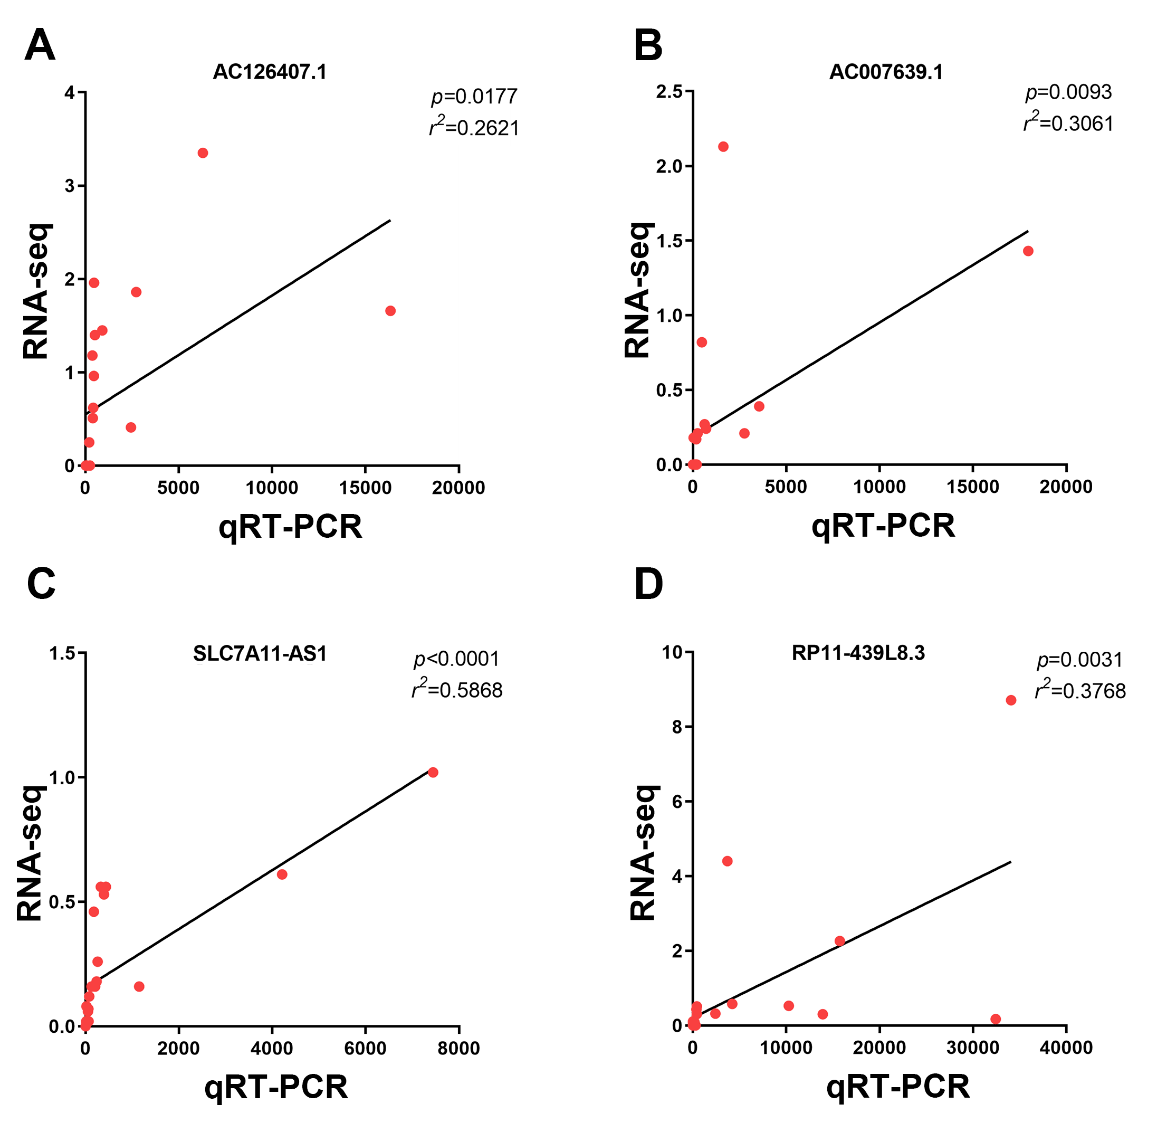


**Supplementary Figure S2. Correlation analysis between qRT-PCR data and RNA-seq data.** Correlation analysis was performed to investigate the consistency of the expressions of lncRNAs AC126407.1 (A), AC007639.1 (B), SLC7A11-AS1 (C) and RP11-439L8.3 (D) detected by RNA-seq and qRT-PCR.


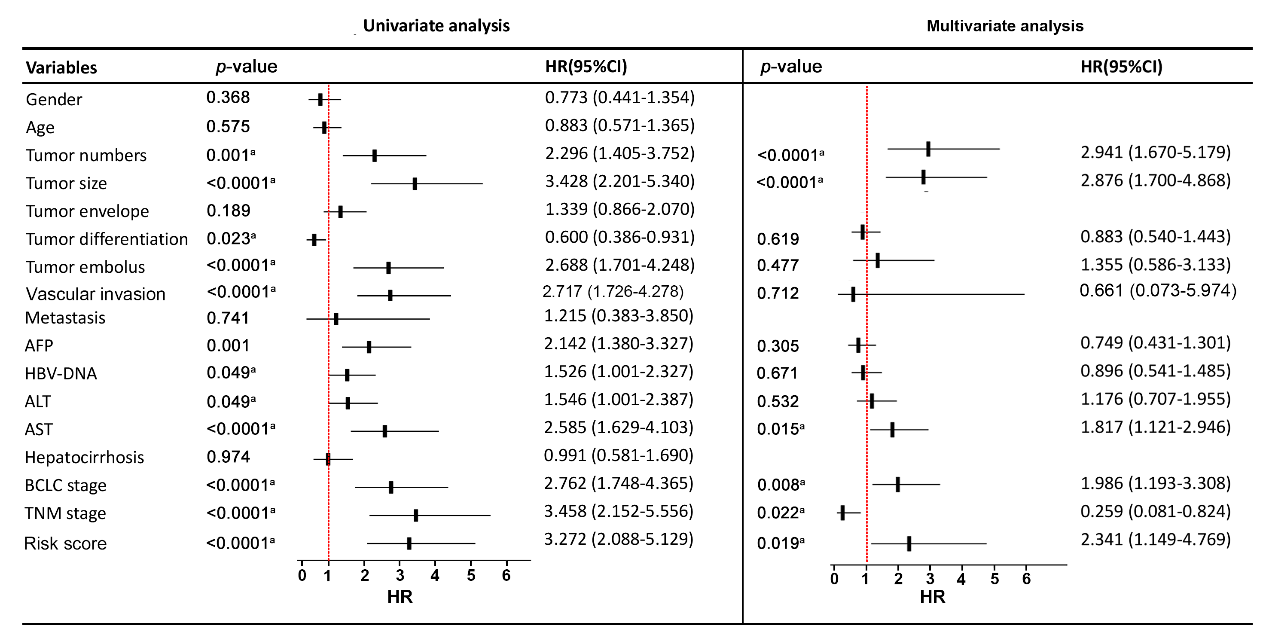


**Supplementary Figure S3. The clinical significance of clinical information and risk score in the validation cohort.**

**Note:** aStatistically significant; **Abbreviations:** AFP, alpha-fetoprotein; HBV-DNA, the desoxyribonucleic acid of hepatitis B virus;ALT, alanine aminotransferase; AST, aspartate aminotransferase; BCLC staging, Barcelona Clinic Liver Cancer staging; TNM staging, Tumor-Node-Metastasis staging (8th edition); CI, confidence interval; HR, hazard ratio.

**Supplementary Table S1. The list of qPCR Primers used in this study**

**Supplementary Table S2. tdAUC value of five prognostic factors for predicting OS and RFS in training and validation cohorts**

| Gene symbol | Sequences (from 5’ to 3’) |
| --- | --- |
| AC007639.1 | F: CAGACTTCAGTCGGCAGCAT |
|  | R: AGAGGTCTCGCAGTTTGCAG |
| AC126407.1 | F: GTGATAGTCAGGCATCAAGGGT |
|  | R: AGGAGCCATGGGGCTTTTATC |
| RP11-439L8.3 | F: CTCCCACGATCTGGCAAC |
|  | R: CAGAACTCACTCCTTCCGAT |
| SLC7A11-AS1 | F: CTTTCTGAAGGACATGCCAA |
|  | R: ACCTGGGCATTCTATAAGCTC |
| 18S | F: AGAAACGGCTACCACATCC  R: CACCAGACTTGCCCTCCA |

|  | Training cohort | |  | Validation cohort | |
| --- | --- | --- | --- | --- | --- |
| tdAUC of OS (95%CI) | tdAUC of RFS (95%CI) |  | tdAUC of OS (95%CI) | tdAUC of RFS (95%CI) |
| RP11-439L8.3 | 0.627 (0.486-0.768) | 0.526 (0.371-0.680) |  | 0.634 (0.556-0.711) | 0.606 (0.519-0.692) |
| SLC7A11-AS1 | 0.691 (0.556-0.827) | 0.696 (0.554-0.838) |  | 0.680 (0.606-0.755) | 0.633 (0.549-0.718) |
| AC007639.1 | 0.757 (0.631-0.883) | 0.711 (0.602-0.821) |  | 0.595 (0.515-0.675) | 0.511 (0.423-0.600) |
| AC126407.1 | 0.614 (0.472-0.756) | 0.561 (0.399-0.722) |  | 0.685 (0.610-0.760) | 0.563 (0.479-0.647) |
| TNM stage | 0.699 (0.564-0.834) | 0.689 (0.551-0.826) |  | 0.607 (0.524-0.689) | 0.557 (0.473-0.641) |

**Abbreviations:** tdAUC, time-dependent area under curve; OS, overall survival; RFS, recurrence free survival; CI, confidence interval
